# Supplementary material
Source: publisher site journal article supplement (https://www.spandidos-publications.com/318/downloadSupplementary)

Figure S1. Regions selected for analysis. Six images were captured at x200 magnification in the region of high laminar shear stress and eight images were captured in the regions of non-uniform shear stress at the bifurcation.

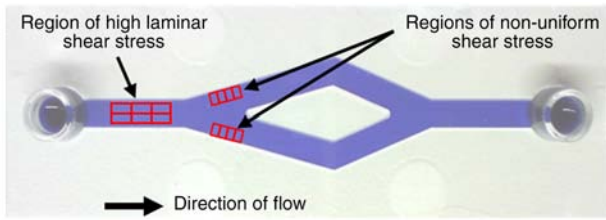

Figure S2. Distribution of the investigated vascular endothelial growth factor 2 polymorphisms in the population. A total of 113 human umbilical vein endothelial cell samples were analyzed using the TaqMan® SNP genotyping assay.

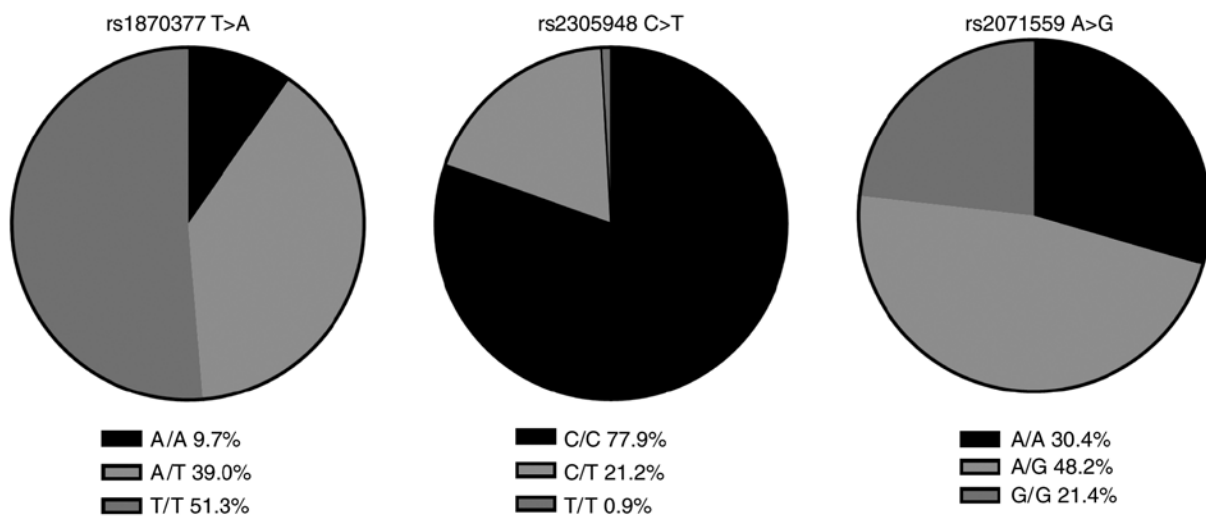

Supplement: Supplementary file 1 [file downloadSupplementary]
